# Supplementary material
Source: bioRxiv or medRxiv preprint supplement (http://medrxiv.stage.highwire.org/highwire/filestream/69276/field_highwire_adjunct_files/0/19007856-1.pdf)
Supplement: Supplementary file [file 19007856-1.pdf]

**Travel time to health facilities as a marker of geographical accessibility across  
heterogeneous land coverage in Peru**

**Gabriel Carrasco-Escobar<sup>1,2,\*</sup>, Edgar Manrique<sup>1</sup>, Kelly Tello-Lizarraga<sup>3</sup>, J. Jaime**

**Miranda<sup>4,5</sup>**

**\* Corresponding Author:** Gabriel Carrasco Escobar, MSc, PhD(c): [gabriel.carrasco@upch.pe](mailto:gabriel.carrasco@upch.pe)

<sup>1</sup> Health Innovation Lab, Institute of Tropical Medicine “Alexander von Humboldt”, Universidad Peruana Cayetano Heredia, Lima, Peru

<sup>2</sup> Division of Infectious Diseases, Department of Medicine, University of California San Diego, La Jolla, CA, USA

<sup>3</sup> Facultad de Salud Publica y Administración, Universidad Peruana Cayetano Heredia, Lima, Peru

<sup>4</sup> CRONICAS Centre of Excellence in Chronic Diseases, Universidad Peruana Cayetano Heredia, Lima, Peru.

<sup>5</sup> School of Medicine, Universidad Peruana Cayetano Heredia, Lima, Peru

**Keywords:** Travel time, geographic accessibility, health care accesibility

- 16 **Supplementary Information 1.** List of complete and shortlist of ecosystems provided by the  
 17 Ministry of Environment.

| <b>Shortlist</b>               | <b>Original Category</b>            |
|--------------------------------|-------------------------------------|
| Coastal and andean agriculture | Coastal and andean agriculture      |
| Non-Amazon forest area         | Non-Amazon forest area              |
| Non-Amazon forest area         | Sand bank                           |
| Hill forest                    | Low hill forest with Shiringa       |
| Hill forest                    | Low hill forest with bale           |
| Hill forest                    | Dry hill forest                     |
| Hill forest                    | Low hill forest                     |
| Hill forest                    | High hill forest                    |
| Hill forest                    | Dry hill high forest                |
| Hill forest                    | Dry hill forest with chesnut        |
| Hill forest                    | high hill forest with bale          |
| Hill forest                    | High hill forest of the Divisor     |
| Mountain forest                | Basimontano mountain forest         |
| Mountain forest                | Altimontano mountain forest         |
| Mountain forest                | Mountain forest                     |
| Mountain forest                | Meander plain forest                |
| Mountain forest                | Dry mountain forest                 |
| Mountain forest                | High relict Andean forest           |
| Mountain forest                | Inter-Andean relict forest          |
| Mountain forest                | Mountain forest                     |
| Mountain forest                | Western Andean montane forest       |
| Mountain forest                | Mesoandino relict forest            |
| Mountain forest                | Mountain Palm Forest                |
| Mountain forest                | Mesoandine relict coniferous forest |
| Mountain forest                | Mountain semi-deciduous forest      |
| Terrace forest                 | High terrace forest with chestnut   |

|                     |                                   |
|---------------------|-----------------------------------|
| Terrace forest      | Riparian dry forest               |
| Terrace forest      | Blackwater Flooded Terrace Forest |
| Terrace forest      | Low Terrace Forest                |
| Terrace forest      | Savanna dry forest                |
| Terrace forest      | High terrace forest               |
| Terrace forest      | Lomada dry forest                 |
| Terrace forest      | Piedmont Dry Forest               |
| Terrace forest      | Low terrace forest with bale      |
| Terrace forest      | High terrace forest with bale     |
| Terrace forest      | Low terrace forest with chestnut  |
| Flooded Palm Forest | Flooded Palm Forest               |
| Flooded Palm Forest | Flooded basimontano palm forest   |
| Water bodies        | Lagoons, lakes and cochas         |
| Water bodies        | River                             |
| Water bodies        | Dam                               |
| Coastal desert      | Coastal desert                    |
| Glacier             | Glacier                           |
| Wetland             | Bofedal                           |
| Wetland             | Coastal wetland                   |
| Wetland             | Hydrophilic grassland             |
| Wetland             | Mangrove swamp                    |
| Wetland             | Albufera                          |
| Hill                | Hill                              |
| Shrub thicket       | Shrub thicket                     |
| Shrub thicket       | Shrub bush                        |
| Forest Plantation   | Forest Plantation                 |
| Coastal vegetation  | White sand vegetation             |
| Coastal vegetation  | Island vegetation                 |
| Coastal vegetation  | Tillandsial                       |

|                        |                                                |
|------------------------|------------------------------------------------|
| Interandean vegetation | Andean Pajonal                                 |
| Interandean vegetation | Cardonal                                       |
| Interandean vegetation | High Andean area with little and no vegetation |
| Interandean vegetation | Highland, desolate                             |
| Interandean vegetation | Jalca                                          |
| Interandean vegetation | Interandean savanna                            |

18

19

20 **Supplementary Information 2**

21 Code GEE: <https://code.earthengine.google.com/1bf3524cfebc89fa540e4c70b699c24>

22 Output GEE: [https://edgarmanrique30.users.earthengine.app/view/country-wide-map-of-travel-](https://edgarmanrique30.users.earthengine.app/view/country-wide-map-of-travel-time-to-health-facilities-for-2018)  
23 [time-to-health-facilities-for-2018](https://edgarmanrique30.users.earthengine.app/view/country-wide-map-of-travel-time-to-health-facilities-for-2018)

24

25
